# Supplementary material for: The innovation characteristics of person-centred care as perceived by healthcare professionals: an interview study employing a deductive-inductive content analysis guided by the consolidated framework for implementation research
Source: Springer Nature journal article supplement (doi:10.1186/s12913-021-06942-y), 2021-09-03
Supplement: MOESM3 [file 19630820]

**Additional File 3. Content analysis of focus groups, dyadic interviews, and individual interviews.** Generic and subcategories generated using an unconstrained matrix with nine pre-defined main categories (CFIR constructs).

| <b>Main categories</b>               | <b>Generic categories</b>                                                                                                                                                                                                   | <b>Subcategories</b>                                                                                                                                                                                                                                                                                                                                                                                                                                                                                                                                                                                                                                                                                                                                                                                                        |
|--------------------------------------|-----------------------------------------------------------------------------------------------------------------------------------------------------------------------------------------------------------------------------|-----------------------------------------------------------------------------------------------------------------------------------------------------------------------------------------------------------------------------------------------------------------------------------------------------------------------------------------------------------------------------------------------------------------------------------------------------------------------------------------------------------------------------------------------------------------------------------------------------------------------------------------------------------------------------------------------------------------------------------------------------------------------------------------------------------------------------|
| <b>Innovation Source</b>             | Mixed perceptions about the origin of PCC                                                                                                                                                                                   | Developed within the unit<br>Developed by the organisation<br>Developed by the organisation and within the unit                                                                                                                                                                                                                                                                                                                                                                                                                                                                                                                                                                                                                                                                                                             |
| <b>Evidence strength and quality</b> | Improved health and systems outcomes in patients<br>Lack of awareness of evidence underlining PCC                                                                                                                           | Shortened hospital stays<br>Research has shown improved health outcomes<br>Unaware of evidence base                                                                                                                                                                                                                                                                                                                                                                                                                                                                                                                                                                                                                                                                                                                         |
| <b>Relative advantage</b>            | In line with ethical values<br><br>Improved work routines<br><br>Sounds intuitively positive and stirs curiosity<br><br>Identical to previous work<br><br>Increased workload and deterioration of well-functioning routines | Equal care for patients<br>In line with values taught in education<br>Improved quality of care<br>How one would like to be approached if a patient oneself<br><br>Improved routines with clear instructions<br>More time with patients due to changed routines<br>Boost work towards same goals<br>Improved contact with patients<br>Allows flexibility to each patient's needs<br><br>Sounds positive without knowing what it entails<br>Excited and curious to know more<br><br>No difference, always worked this way<br>A new and fancy word for something that we already do<br>Tied more strongly to some vocational roles and settings<br><br>Changing routines that are perceived to already work<br>More workload for an already tired workforce<br>Different views on relative advantage based on vocational roles |
| <b>Adaptability</b>                  | Adaptable to specific contexts                                                                                                                                                                                              | Flexible methods and solutions for integrating PCC<br>More easily adapted to some contexts than others                                                                                                                                                                                                                                                                                                                                                                                                                                                                                                                                                                                                                                                                                                                      |
| <b>Trialability</b>                  | Initial piloting to test applicability                                                                                                                                                                                      | Initiated in parts of the unit<br>Starting on a small scale so as not to scare HCPs<br>Tried routines that were abandoned                                                                                                                                                                                                                                                                                                                                                                                                                                                                                                                                                                                                                                                                                                   |
| <b>Complexity</b>                    | Abstract phenomenon that gives rise to conflicting views                                                                                                                                                                    | A vague construct that is difficult to grasp<br>Conflicting understandings amongst HCPs                                                                                                                                                                                                                                                                                                                                                                                                                                                                                                                                                                                                                                                                                                                                     |

|                      |                                                                              |                                                                                                                                                                                                                                                                                                                                                                                                                                   |
|----------------------|------------------------------------------------------------------------------|-----------------------------------------------------------------------------------------------------------------------------------------------------------------------------------------------------------------------------------------------------------------------------------------------------------------------------------------------------------------------------------------------------------------------------------|
|                      |                                                                              | <p>Difficult to explain and unclear what it entails in practice</p> <p>A vast concept that entails everything in healthcare</p> <p>Easier to accommodate and endorse than HCPs think</p>                                                                                                                                                                                                                                          |
|                      | Leaves HCPs with ethical dilemmas and conflicting views                      | <p>Patient's wishes lead to ethical dilemmas</p> <p>Routines can both aid and hamper PCC</p> <p>Prioritising when resources are scarce</p> <p>Conflicting views between relatives' and patient's wishes</p>                                                                                                                                                                                                                       |
|                      | Viewing and treating patients as persons is complex                          | <p>Difficulties in communication complicates partnership</p> <p>Patient expectations and changes in power relationships makes partnership complex</p> <p>PCC works with all patients</p> <p>Relatives' involvement ambiguous</p>                                                                                                                                                                                                  |
|                      | Requires a variation in skills and personal qualities in HCPs                | <p>Being able to accommodate difficult narratives</p> <p>Acting as a role model</p> <p>Being compassionate, attentive and a skilful listener</p> <p>Having a flexible attitude</p> <p>Being skilled in communication with patients</p> <p>Being skilled in communication within and across organisations</p> <p>Capturing the person's life world</p> <p>Being skilled in including the person's perspective in documentation</p> |
|                      | Requires integration within the team and between HCPs                        | <p>Developing a deeper understanding of each other</p> <p>Sharing the same values within the team</p> <p>Having regular discussions and reflections within the team</p> <p>Creating a feeling of togetherness with the patient</p> <p>Working towards the same goals</p> <p>Bringing new team members into the approach</p>                                                                                                       |
| <b>Compatibility</b> | Conflicting mixture of norms and values                                      | <p>In line with own norms and values</p> <p>Working similarly before</p> <p>Norms described as being divergent within and across units</p>                                                                                                                                                                                                                                                                                        |
|                      | Contrasting perceptions of PCC routines and their fit with existing workflow | <p>Distinctions between own and other HCPs' performance within and across units</p> <p>Choosing between set routines and staying flexible to patient needs</p> <p>Great potential to increase PCC routines</p> <p>PCC disturbs routines that are firmly in place</p>                                                                                                                                                              |

|                            |                                                                                 |                                                                                                                                                                                                                                                                                                                       |
|----------------------------|---------------------------------------------------------------------------------|-----------------------------------------------------------------------------------------------------------------------------------------------------------------------------------------------------------------------------------------------------------------------------------------------------------------------|
|                            | Perceived similarities between PCC and other concepts increase compatibility    | Motivational interviewing<br>Terma<br>Comprehensive Geriatric Assessment<br>Patient-focused care                                                                                                                                                                                                                      |
| <b>Observability</b>       | More satisfied and involved patients                                            | Patients report that they feel listened to and are satisfied with care<br>Patients are more involved in their care<br>Less anxious patients<br>Patients reach goals and are discharged sooner<br>More trustful relations<br>Patients lose their self-esteem and become hospitalised when work is not in line with PCC |
|                            | More meaningful, and improved work environment but also demanding               | Work more satisfying and meaningful<br>Better flow, safer and less stressful<br>More trust in patient's own capacity<br>Exhausting to listen to patients' narratives<br>Ethical stress when work situation does not enable PCC                                                                                        |
|                            | Improved relationships and workflow within the team                             | Stronger and tighter team<br>Less stress and more fun within the group<br>Increased humility between team members                                                                                                                                                                                                     |
|                            | Mixed perceptions of work in team                                               | No perceived changes in the team<br>Various levels of changes in different teams                                                                                                                                                                                                                                      |
| <b>Available resources</b> | Requires overcapacity of resources to maintain PCC                              | Difficult to maintain PCC when short of staff<br>Difficult to maintain PCC when patients need more time-consuming care than normal at the unit<br>Feelings of stress make it difficult to accommodate principles of PCC                                                                                               |
|                            | Physical environment can hamper or facilitate PCC                               | Secrecy issues with several patients in multi-bed room<br>More time efficient when patients are in multi-bed room<br>Physical distance between team members complicates PCC teamwork                                                                                                                                  |
|                            | Required resources dependent upon context and operationalisation of the concept | Saves time in the long run<br>More time consuming<br>Less time consuming<br>More, well-educated staff                                                                                                                                                                                                                 |
